# Supplementary material for: Interference with Clp protease impairs carotenoid accumulation during tomato fruit ripening
Source: PubMed Central journal article supplement (PMC5888976; doi:10.1093/jxb/erx491), 2018-01-29
Supplement: erx491_suppl_supplementary_figures_s1_s8_tables_s1_s4.pdf [file erx491_suppl_supplementary_figures_s1_s8_tables_s1_s4.pdf]

## Supplementary Figures

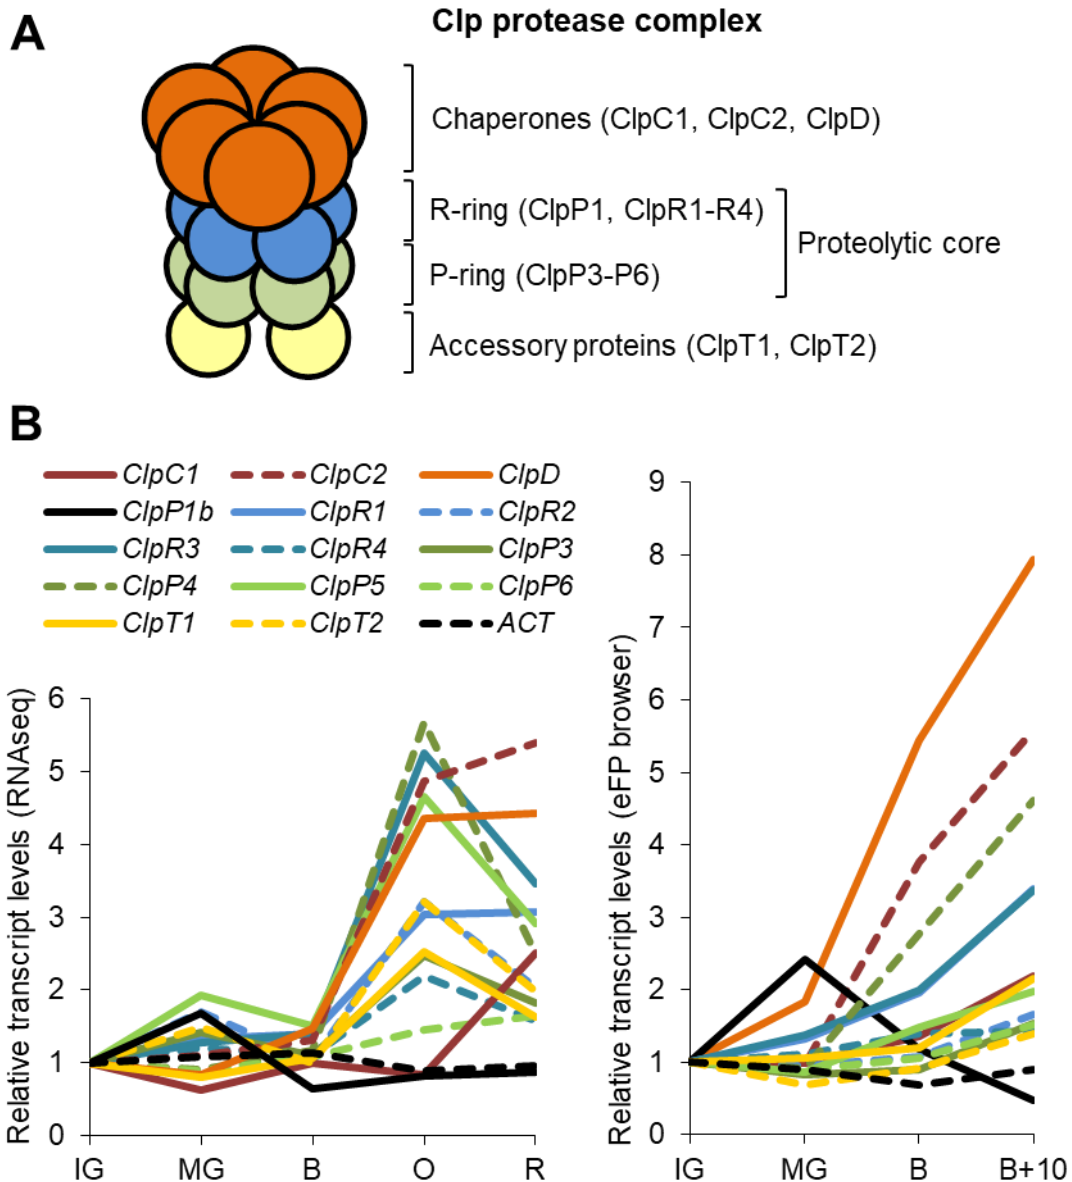

**Fig. S1. Clp protease subunits and their expression during tomato fruit ripening.**

(A) The cartoon shows the structural organization of the stromal Clp complex. Chaperones unfold and translocate protein substrates into the proteolytic chamber for degradation into small peptides that are emitted through the lateral pores of the chamber. (B) Graphs show the level of transcripts for Clp subunits in the pericarp (flesh) of tomato fruit. The profile of the qPCR reference gene *ACT* (Soly04g011500) is also shown. Graph in the left represents RNAseq data from the Aharoni lab ([www.weizmann.ac.il/plants/aharoni/made-aa-lab](http://www.weizmann.ac.il/plants/aharoni/made-aa-lab)) corresponding to immature green (IG), mature green (MG), breaker (B), orange (O), and red ripe (R) fruit. Graph in the right contains data from the tomato eFP browser ([http://bar.utoronto.ca/efp\\_tomato](http://bar.utoronto.ca/efp_tomato)) corresponding to fruit at the following stages: 3 cm (IG), MG, breaker (B), and 10 days after breaker (B+10). In both graphs, results are represented relative to the levels in IG fruit. See Table S2 for accessions.

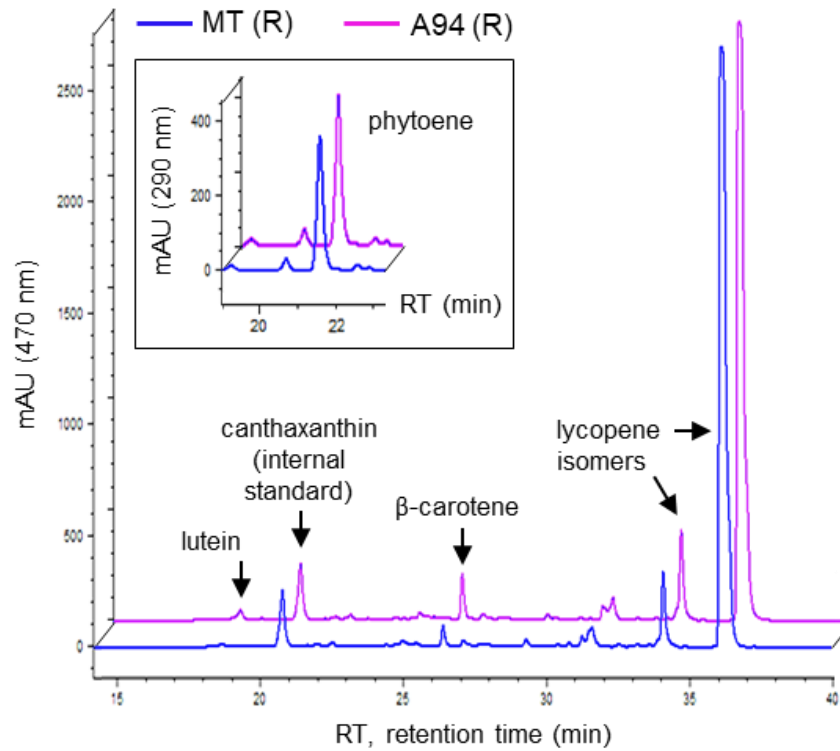

**Fig. S2. HPLC chromatograms of carotenoids in ripe fruit.** Pericarp from fruit collected from MT and A94 plants at the R stage (52 DPA) was used for carotenoid extraction and HPLC analysis using the non-plant carotenoid canthaxanthin as an internal standard as described (Rodríguez-Concepción *et al.*, 2004). Representative HPLC chromatograms are shown. Lutein,  $\beta$ -carotene, and lycopene, together with canthaxanthin, were detected at 470 nm. Phytoene was detected at 290 nm (inset).

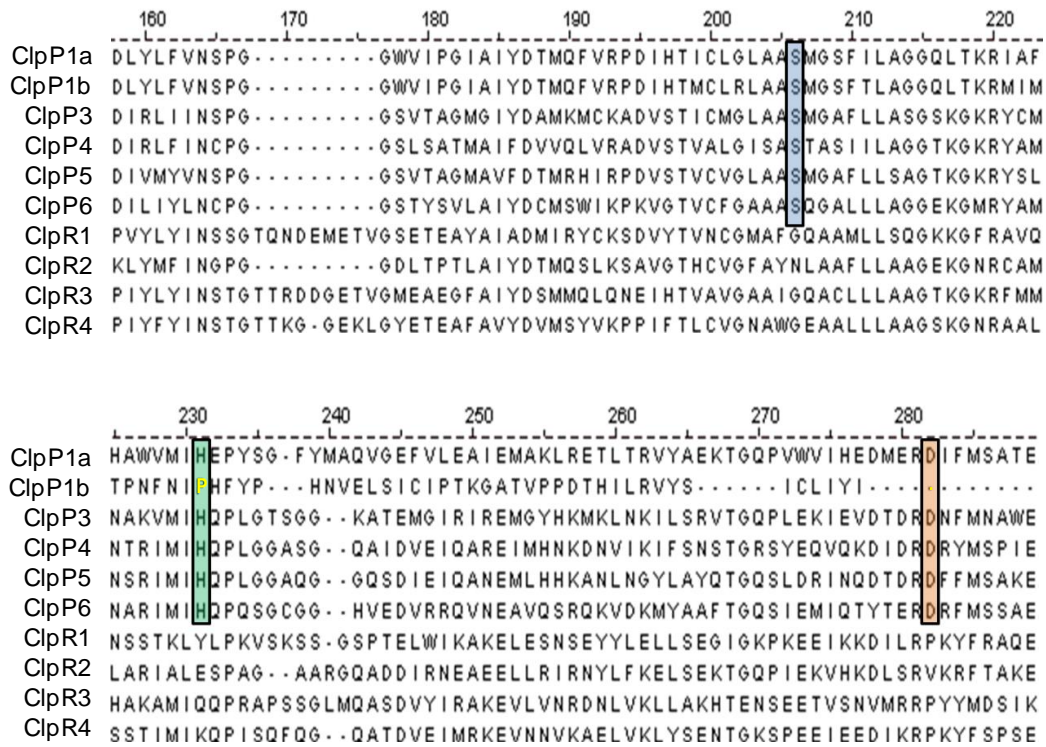

**Fig. S3. Alignment of the region harboring the catalytic triad of Clp proteolytic subunits.** Multiple alignment was performed with the MEGA6 software using the protein sequences listed in Table S2. Triad residues are boxed.

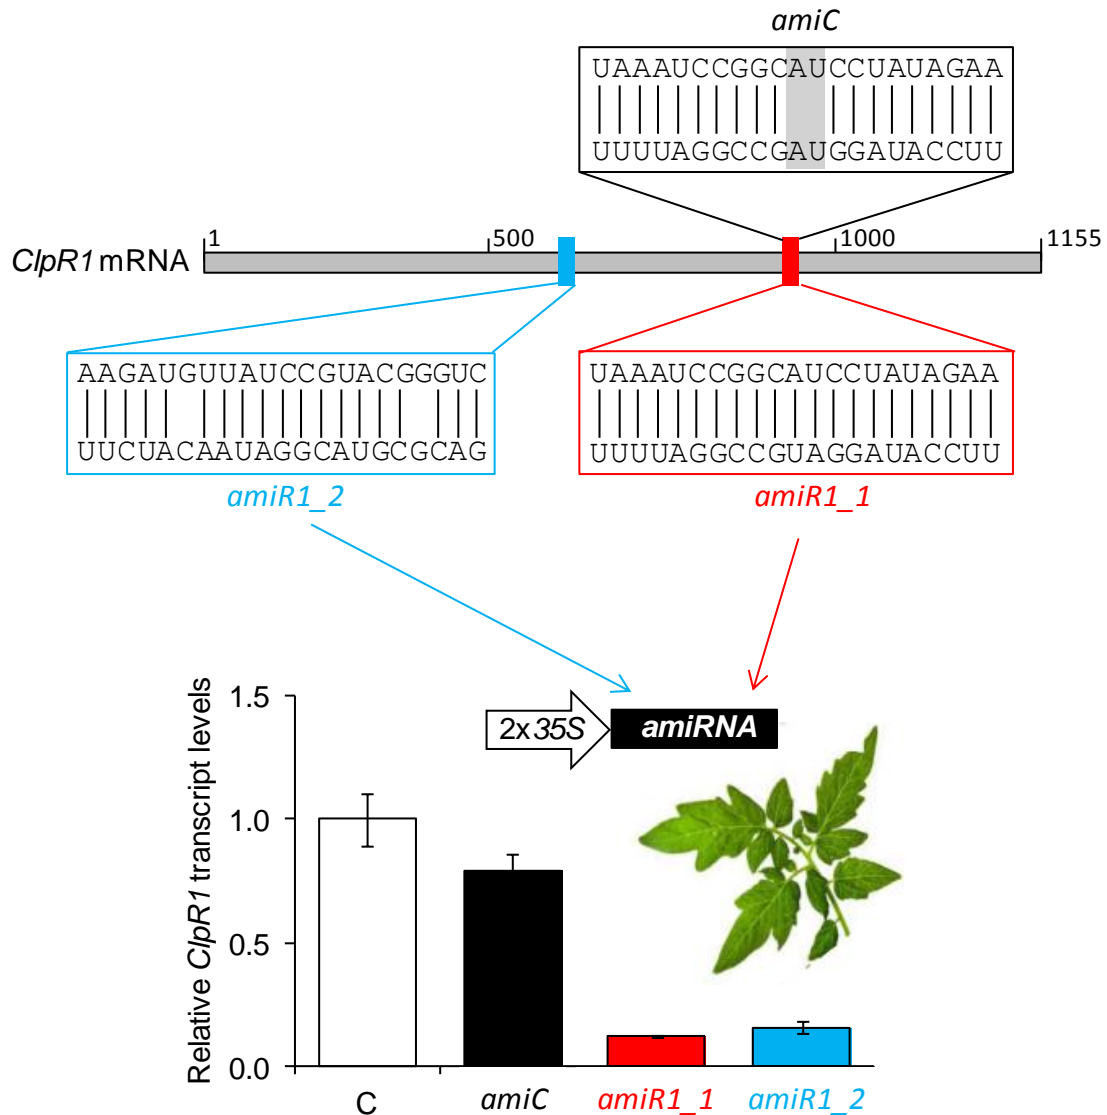

**Fig. S4. Position and validation of amiRNA sequences.** The upper cartoon shows the regions in the tomato *ClpR1* mRNA targeted by *amiR1\_1* (red box) and *amiR1\_2* (blue box). The mutations in the *amiR1\_1* sequence that render the construct inactive (*amiC*, black box) are highlighted in gray. For validation, amiRNAs were cloned under the control of the 2x35S promoter and the generated constructs were agroinfiltrated in independent tomato leaves. The lower graph shows a qPCR analysis of *ClpR1* transcript levels in leaves transiently expressing the indicated amiRNAs. Data correspond to mean  $\pm$  SEM of n=3 leaves and they are represented relative to *ClpR1* transcript levels in leaves agroinfiltrated with a similar vector harboring an unrelated amiRNA (C).

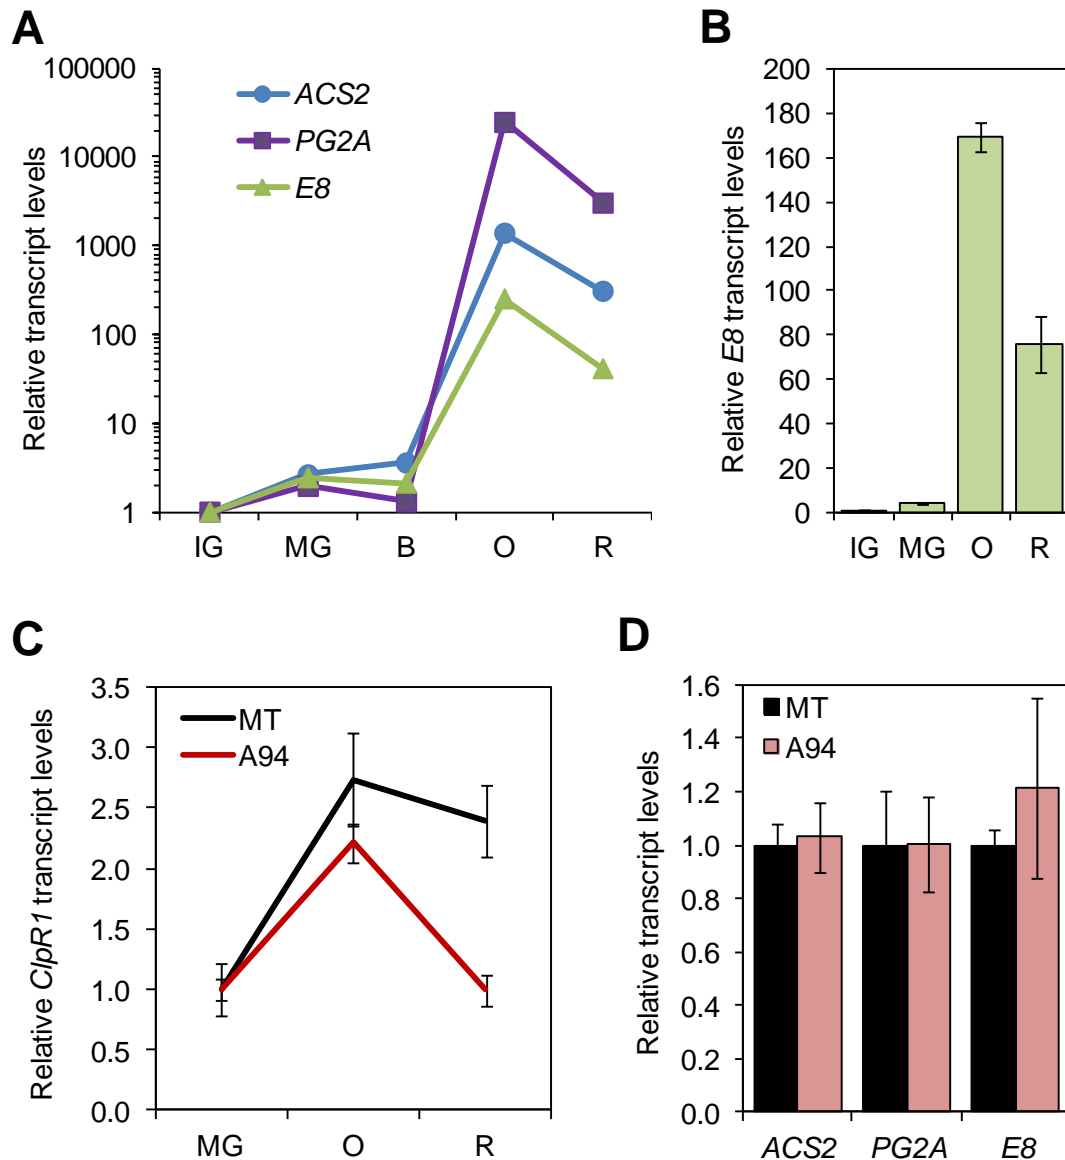

**Fig. S5. Transcript levels of ripening marker genes in wild-type and *ClpR1*-silenced fruits.** (A) Level of transcripts of ripening-related genes *E8* (Solyc09g089580), *PG2A* (Solyc10g080210) and *ACS2* (Solyc01g095080) in the pericarp (flesh) of tomato fruit at the indicated stages of ripening (RNAseq data from the Aharoni lab represented in a log10 scale relative to the levels in IG fruit; see Fig. S1). (B) Quantitative RT-PCR (qPCR) analysis of *E8* transcripts in MT fruits. Mean  $\pm$  SEM of  $n \geq 3$  fruits are shown relative to IG samples. (C) Transcript levels of *ClpR1* in fruits from MT and *E8:amiR1* (line A94) plants at the indicated stages. Mean  $\pm$  SEM of  $n \geq 3$  fruits are shown relative to MT fruit at the MG stage. No statistically significant differences relative to reference MT samples were found. (D) Levels of *E8*, *PG2A* and *ACS2* transcripts detected by qPCR in ripe fruits from MT and A94 plants. Mean  $\pm$  SEM of  $n \geq 3$  fruits are shown relative to MT samples. No statistically significant differences relative to reference MT samples were found.

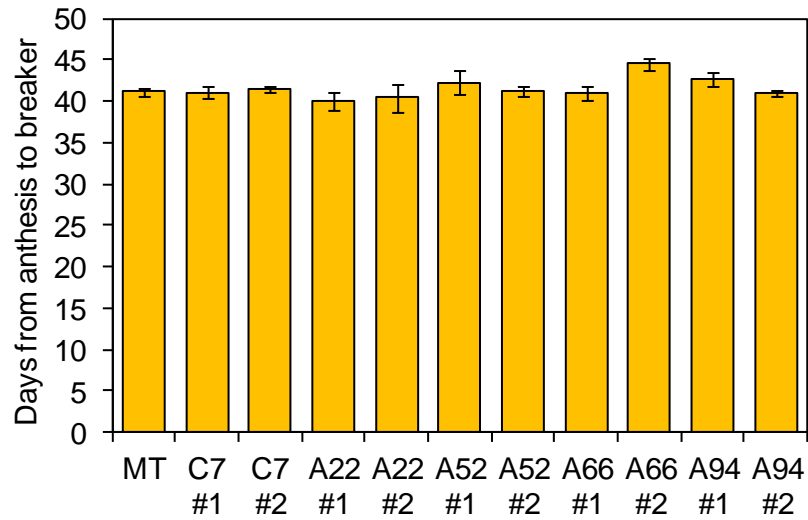

**Fig. S6. Ripening rate of transgenic tomato lines.** MT and transgenic plants of the indicated lines were grown in the greenhouse. At least five flowers from each of two plants of every transgenic line (#1 and #2) were tagged at anthesis and left to self-pollinate. The graph represents the mean and SEM of the number of days from the day of anthesis (day 0) to the day when the first signs of chlorophyll loss and carotenoid overaccumulation were visually detected (breaker stage). No statistical differences were found.



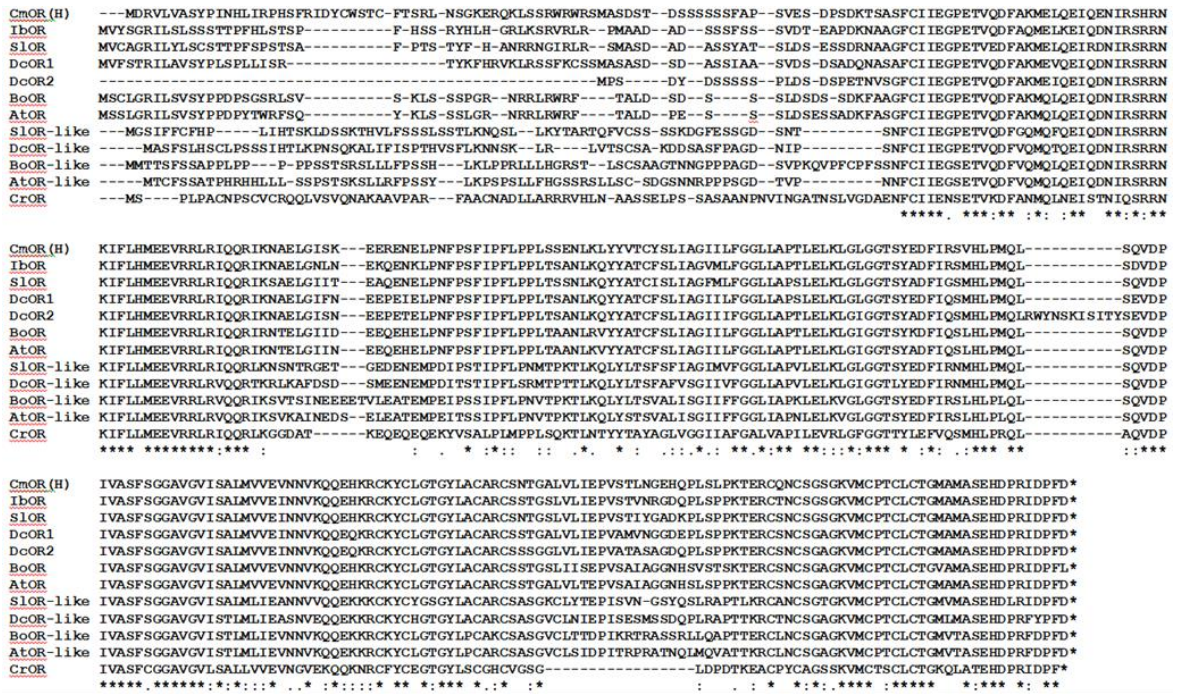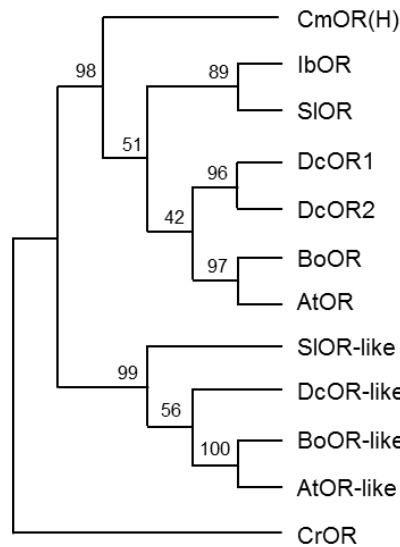

**Fig. S7. Alignment of OR proteins from several plants.** Multiple alignment was performed with the MEGA6 software using the following protein sequences: *Chlamydomonas reinhardtii* CrOR (Cre06.g279500.t1.1), *Cucumis melo* CmOR(H) (A0A0D3MU50.1), *Arabidopsis thaliana* AtOR (AT5G61670.1) and AtOR-like (AT5G06130.2), *Brassica oleracea* BoOR (Bol036294) and BoOR-like (Bol024498), *Daucus carota* DcOR1 (DCAR\_020166), DcOR2 (DCAR\_009463), and DcOR-like (DCAR\_009172), *Ipomoea batatas* IbOR (HQ828087), and *Solanum lycopersicum* SIOR (Solyc03g093830.2.1) and SIOR-like (Solyc09g010110). A Maximum Likelihood tree constructed with these data is also shown.

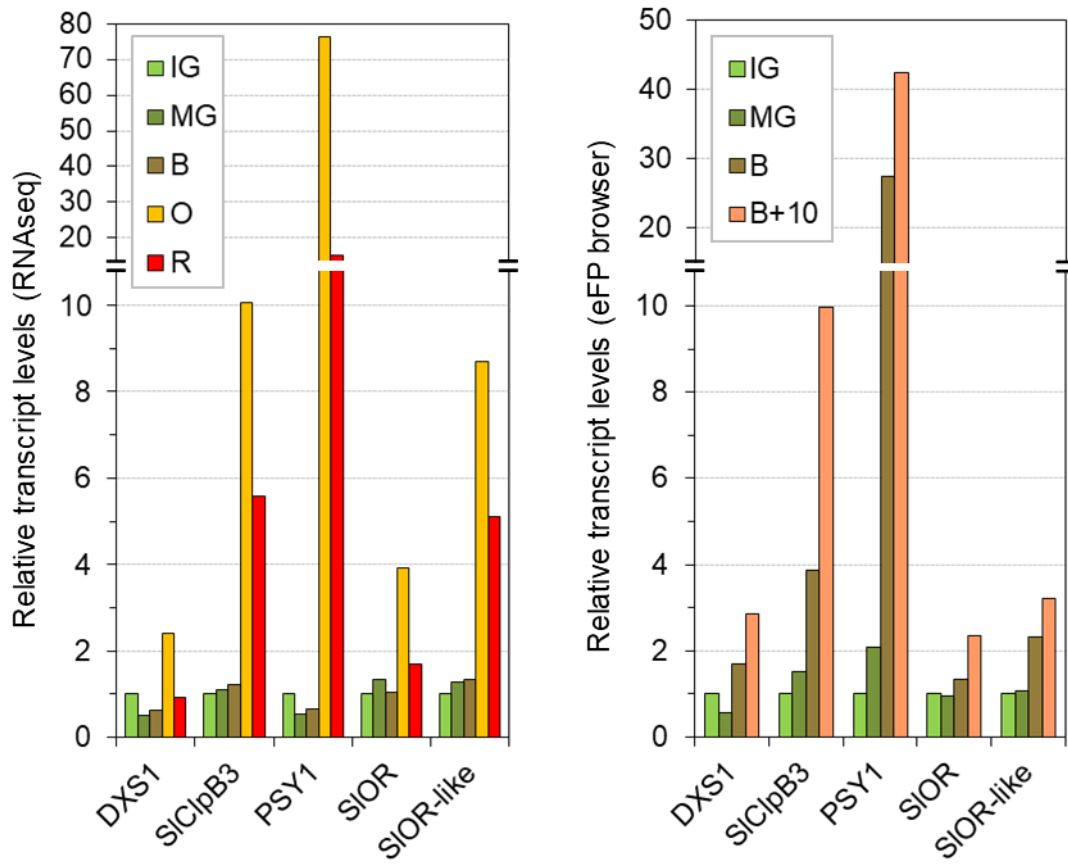

**Fig. S8. Expression pattern of genes encoding carotenoid biosynthetic enzymes and chaperones controlling their stability during tomato fruit ripening.** Data correspond to publicly available RNAseq results (left graph) and eFP browser data (right graph) from tomato pericarp samples as described in Fig. S1. Values are represented in a log<sub>10</sub> scale relative to the levels in IG fruit. Accessions are listed in Table S1.



## Supplementary Tables

Table S1. Carotenoid-related proteins.

| Name                                         | Arabidopsis          |                 | Tomato               |                                  |
|----------------------------------------------|----------------------|-----------------|----------------------|----------------------------------|
|                                              | Protein abbreviation | Gene identifier | Protein abbreviation | Gene identifier                  |
| deoxyxylulose-5-phosphate synthase           | DXS                  | At4g15560       | DXS1                 | Solyc01g067890                   |
| plastidial Hsp100 type B chaperone           | ClpB3                | At5g15450       | SlClpB3              | Solyc02g088610                   |
| phytoene synthase                            | PSY                  | At5g17230       | PSY1                 | Solyc03g031860                   |
| phytoene desaturase                          | PDS                  | At4g14210       | PDS                  | Solyc03g123760                   |
| $\zeta$ -carotene desaturase                 | ZDS                  | At3g04870       | ZDS                  | Solyc01g097810                   |
| 15- <i>cis</i> - $\zeta$ -carotene isomerase | Z-ISO                | At1g10830       | Z-ISO                | Solyc12g098710                   |
| carotenoid isomerase                         | CRTISO               | At1g06820       | CRTISO               | Solyc10g081650                   |
| lycopene $\beta$ -cyclase                    | LCYB                 | At3g10230       | LCYB<br>CYCB         | Solyc10g079480<br>Solyc06g074240 |
| lycopene $\epsilon$ -cyclase                 | LCYE                 | At5g57030       | LCYE                 | Solyc12g008980                   |
| non-heme di-iron carotenoid hydroxylase      | BCH1                 | At4g25700       | BCH1                 | Solyc06g036260                   |
|                                              | BCH2                 | At5g52570       | BCH2                 | Solyc03g007960                   |
| cytochrome P450 carotenoid hydroxylase       | CYP97A3              | At1g31800       | CYP97A29             | Solyc04g051190                   |
|                                              | CYP97B3              | At4g15110       | CYP97B3              | Solyc05g016330                   |
|                                              | CYP97C1              | At3g53130       | CYP97C11             | Solyc10g083790                   |
| carotenoid cleavage dioxygenase              | CCD1                 | At3g63520       | CCD1A                | Solyc01g087250                   |
|                                              |                      |                 | CCD1B                | Solyc01g087260                   |
|                                              | CCD4                 | At4g19170       | CCD4A                | Solyc08g075480                   |
|                                              |                      |                 | CCD4B                | Solyc08g075490                   |
| orange chaperone                             | AtOR                 | At5g61670       | SIOR                 | Solyc03g093830                   |
|                                              | AtOR-like            | At5g06130       | SIOR-like            | Solyc09g010110                   |

Table S2. Tomato homologues of the Clp protease complex subunits.

| Protein abbreviation | Arabidopsis gene identifier | Tomato gene identifier      | Identity (%) <sup>2</sup> | Subcellular localization <sup>3</sup> |
|----------------------|-----------------------------|-----------------------------|---------------------------|---------------------------------------|
| ClpP1                | AtCg00670                   | emb AM087200 <sup>1</sup>   | 75                        | P                                     |
|                      |                             | Solyc01g007490 <sup>1</sup> | 75                        | other                                 |
|                      |                             | Solyc09g065790              | 71                        | other                                 |
| ClpP2                | At5g23140                   | Solyc04g009310              | 85                        | M                                     |
| ClpP3                | At1g66670                   | Solyc02g091280              | 75                        | P                                     |
| ClpP4                | At5g45390                   | Solyc08g075750              | 64                        | P                                     |
| ClpP5                | At1g02560                   | Solyc01g100520              | 78                        | P                                     |
| ClpP6                | At1g11750                   | Solyc10g051310              | 70                        | P                                     |
| ClpR1                | At1g49970                   | Solyc10g049710              | 66                        | P                                     |
| ClpR2                | At1g12410                   | Solyc08g079620              | 68                        | P                                     |
| ClpR3                | At1g09130                   | Solyc01g099690              | 77                        | P                                     |
| ClpR4                | At4g17040                   | Solyc08g077890              | 76                        | P                                     |
| ClpC1                | At5g50920                   | Solyc12g042060              | 90                        | P                                     |
| ClpC2                | At3g48870                   | Solyc03g118340              | 86                        | P                                     |
| ClpD                 | At5g51070                   | Solyc03g117950              | 67                        | P                                     |
| ClpT1                | At4g25370                   | Solyc03g007110              | 56                        | P                                     |
| ClpT2                | At4g12060                   | Solyc08g079660              | 47                        | P                                     |

<sup>1</sup> Same sequence<sup>2</sup> Compared to the corresponding Arabidopsis protein sequence<sup>3</sup> TargetP (P, plastid; M, mitochondria)

**Table S3.** Primers used in this work.

| Use               | Name                                     | Sequence (5'-3')                                 |
|-------------------|------------------------------------------|--------------------------------------------------|
| amiRNA constructs | miR1-A                                   | GGGGACAACCTTTTCTATACAAAGTTGCTCCCCAACACACGCTCGGA  |
|                   | miR1-B                                   | GGGGACAACCTTTTATTATACAAAGTTGTCCCATGGCGATGCCCTTAA |
|                   | R1_1 I-s                                 | GATTTTAGGCCGATGGATACCTTCTCTCTTTTGTATTCCA         |
|                   | R1_1 II-a                                | AGAAGGTATCCATCGGCCTAAAATCAAAGAGAATCAATGA         |
|                   | R1_1 III*s                               | AGAAAGTATCCATCGCCCTAAATTCACAGGTCGTGATATG         |
|                   | R1_1 IV*a                                | GAATTTAGGCCGATGGATACTTTCTACATATATATTCTTA         |
|                   | R1_2 I-s                                 | GATTCTACAATAGGCATGCGCAGCTCTCTTTTGTATTCCA         |
|                   | R1_2 II-a                                | AGCTGCGCATGCCTATTGTAGAATCAAAGAGAATCAATGA         |
|                   | R1_2 III*s                               | AGCTACGCATGCCTAATGTAGATTACAGGTCGTGATATG          |
|                   | R1_2 IV*a                                | GAATCTACATTAGGCATGCGTAGCTACATATATATTCTTA         |
|                   | C I-s                                    | GATTTTAGGCCGTAGGATACCTTCTCTCTTTTGTATTCCA         |
|                   | C II-a                                   | AGAAGGTATCCTACGGCCTAAAATCAAAGAGAATCAATGA         |
| C III*s           | AGAAAGTATCCTACGGCCTAAATTCACAGGTCGTGATATG |                                                  |
| C IV*a            | GAATTTAGGCCGTAGGATACTTTCTACATATATATTCTTA |                                                  |
| RT-qPCR           | ACT-F                                    | CCTCCACATGCCATTCTCC                              |
|                   | ACT-R                                    | CCACGCTCGGTCAAGATCT                              |
|                   | ClpR1-F                                  | CCACTTTCTTGCCTACTC                               |
|                   | ClpR1-R                                  | GAAGAGAATCTGAAAAGAAG                             |
|                   | ClpR2-F                                  | CACTGCTAAAGAAGCTCTTG                             |
|                   | ClpR2-R                                  | CAGTGATATCCCTCGGCG                               |
|                   | ClpR3-F                                  | TTCTTTTCAAGCTTCCGTTGA                            |
|                   | ClpR3-R                                  | CAACCGCAAGCACGTGGC                               |
|                   | ClpR4-F                                  | ATGGAAGCTGTCACTATTGC                             |
|                   | ClpR4-R                                  | TGAGGCACGGCAACTCGC                               |
|                   | ClpP3-F                                  | TTGGTTGATGCTGTTATAGATGAC                         |
|                   | ClpP3-R                                  | TTTTGGTGGAGGTGCATCCT                             |
|                   | ClpP4-F                                  | ATTGACGGTGTAATTGACAGAGA                          |
|                   | ClpP4-R                                  | ATTTTCATAGGGTCTTGGATCAA                          |
|                   | ClpP5-F                                  | TCATGAGCGCAAAGGAAGCT                             |
|                   | ClpP5-R                                  | CAAGTGGTTGAAGGGCTTTCA                            |
|                   | ClpP6-F                                  | GTTCAATGAGTACGAATCCGG                            |
|                   | ClpP6-R                                  | GGCATGATGGCGGATTAG                               |
|                   | ClpB3-F                                  | TCGACCGGGTAAATCTTGAG                             |
|                   | ClpB3-R                                  | TGACGCTGCAAGGTGTTTAG                             |
|                   | DXS1-F                                   | TGACCATGGATCTCCTGTTG                             |
|                   | DXS1-R                                   | GCCTCTCTGGTTTGTCCAAG                             |
|                   | PSY1-F                                   | GCCATTGTTGAAAGAGAGGGTG                           |
|                   | PSY1-R                                   | AGGCAAACCAACTTTTCTCAC                            |
|                   | LCYE-F                                   | GCCACAAGAACGAAAACGAC                             |
|                   | LCYE-R                                   | CGCGGAAAATGACCTTATC                              |
|                   | LCYB-F                                   | TTGTGGCCCATAGAAAGGAG                             |
|                   | LCYB-R                                   | GGCATCGAAAACCTTCTTG                              |
|                   | CYCB-F                                   | TGGCAAGGGTTCCTTTCTTC                             |
|                   | CYCB-R                                   | AGTCATGTTTGGAGCCATGTCC                           |
|                   | BCH1-F                                   | TGCTGCTGTAGGAATGGAGTT                            |
|                   | BCH1-R                                   | TCCTTCTCTTGGTTTGTGGTG                            |
|                   | BCH2-F                                   | CTCGGACAAAATTTGATGGTGT                           |
|                   | BCH2-R                                   | CCTTCGGTTGACTTCTTTTC                             |
|                   | CYP97A29-F                               | TTGGGAAGAAGCCGATAGATT                            |
|                   | CYP97A29-R                               | ACCGAAGGGAAGGTAAGTAA                             |
|                   | CYP97B3-F                                | AATGAAGAAAGCGCAGTCAGA                            |
|                   | CYP97B3-R                                | CCACGACAATAAGTCGCAAT                             |
|                   | CYP97C11-F                               | GCTGTGGTTCATCTCTTCAC                             |
|                   | CYP97C11-R                               | GCCAGAAATTGCATCAGGTAA                            |
|                   | CCD1A-F                                  | TTGATTACCTGCCGCTTGT                              |
|                   | CCD1A-R                                  | CATATAGCTCATTGCAGAAATC                           |
|                   | CCD1B-F                                  | AGAATCCAGATCTTGACGCGATT                          |
|                   | CCD1B-R                                  | CCTCATCTCATACAACTCATTG                           |
|                   | CCD4A-F                                  | GTGGGGTAGTGAGTAGACATCC                           |
|                   | CCD4A-R                                  | ACGTCCTACATGCCACTATGC                            |
|                   | CCD4B-F                                  | GGAATGGTGAGCAGACATCC                             |
|                   | CCD4B-R                                  | GACGATCAATTTCTGCTACGG                            |
|                   | CCD7-F                                   | TCAGTCCAAAAGTGGTCAGC                             |
|                   | CCD7-R                                   | TGCATATTCAACCACAAGAAGG                           |
|                   | CCD8-F                                   | CCTTCTGAACCATCTTTGTGG                            |
|                   | CCD8-R                                   | AACCAACAACCATGTAGCC                              |
|                   | OR-F                                     | TTGGGACTAGGAGGCACATC                             |
|                   | OR-R                                     | AGAGATCACCCCAACTGCAC                             |
|                   | OR-I-F                                   | GGATTATGGTCTTCGGTGGA                             |
|                   | OR-I-R                                   | ACCTGGCTCAATTGCATAGG                             |
| ACS2-F            | CGTTTGAATGTCAAGAGCCAGG                   |                                                  |
| ACS-R             | TCGCGAGCGCAATATCAAC                      |                                                  |
| PG2A-F            | ATGGCAATGGACAAGTATGGTG                   |                                                  |
| PG2A-R            | TTAAGGCCGTTGGTGCATC                      |                                                  |
| E8-F              | AGCTGCAAGTTGGAGAGACACG                   |                                                  |
| E8-R              | CCGCATGGAGTTGGAAATTC                     |                                                  |

**Table S4.** Comparison of reference genes for qPCR analysis of carotenoid-related gene expression during tomato fruit ripening.

| Gene type                 | Gene name    | Gene identifier | Primer efficiency                         | Expression level at MG / B / B+10 <sup>(3)</sup> |
|---------------------------|--------------|-----------------|-------------------------------------------|--------------------------------------------------|
| <b>Reference</b>          | <i>CAC</i>   | Solyc08g006960  | 0.88 <sup>(1)</sup> - 0.93 <sup>(2)</sup> | 24.28 / 21.75 / 25.65                            |
|                           | <i>EXP</i>   | Solyc07g025390  | 0.88 <sup>(1)</sup> - 0.87 <sup>(2)</sup> | 13.40 / 8.05 / 14.91                             |
|                           | <i>ACT</i>   | Solyc04g011500  | 0.96                                      | 163.12 / 124.90 / 162.10                         |
| <b>Carotenoid-related</b> | <i>ClpR1</i> | Solyc10g049710  | 0.99                                      | 132.75 / 197.65 / 341.93                         |
|                           | <i>DXS1</i>  | Solyc01g067890  | 0.90                                      | 59.54 / 176.03 / 295.39                          |
|                           | <i>PSY1</i>  | Solyc03g031860  | 0.91                                      | 188.53 / 2466.46 / 3813.63                       |

<sup>1</sup> Gonzalez-Aguilera *et al.*, 2016

<sup>2</sup> Exposito-Rodriguez *et al.*, 2008

<sup>3</sup> Tomato eFP browser values at the indicated ripening stages (see Fig. S1 and S8).

**References**

**Expósito-Rodríguez M, Borges AA, Borges-Pérez A, Pérez JA.** 2008. Selection of internal control genes for quantitative real-time RT-PCR studies during tomato development process. *BMC Plant Biology* **8**, 131.

**González-Aguilera KL, Saad CF, Chávez Montes RA, Alves-Ferreira M, de Folter S.** 2016. Selection of Reference Genes for Quantitative Real-Time RT-PCR Studies in Tomato Fruit of the Genotype MT-Rg1. *Frontiers in Plant Science* **7**, 1386.

**Rodríguez-Concepción M, Forés O, Martínez-García JF, González V, Phillips MA, Ferrer A, Boronat A.** 2004. Distinct Light-Mediated Pathways Regulate the Biosynthesis and Exchange of Isoprenoid Precursors during Arabidopsis Seedling Development. *Plant Cell* **16**, 144-156.
